# Supplementary material
Source: PubMed Central journal article supplement (PMC3812084)
Supplement: NIHMS497580-supplement-2.pdf [file NIHMS497580-supplement-2.pdf]

## Supplemental Data

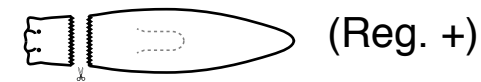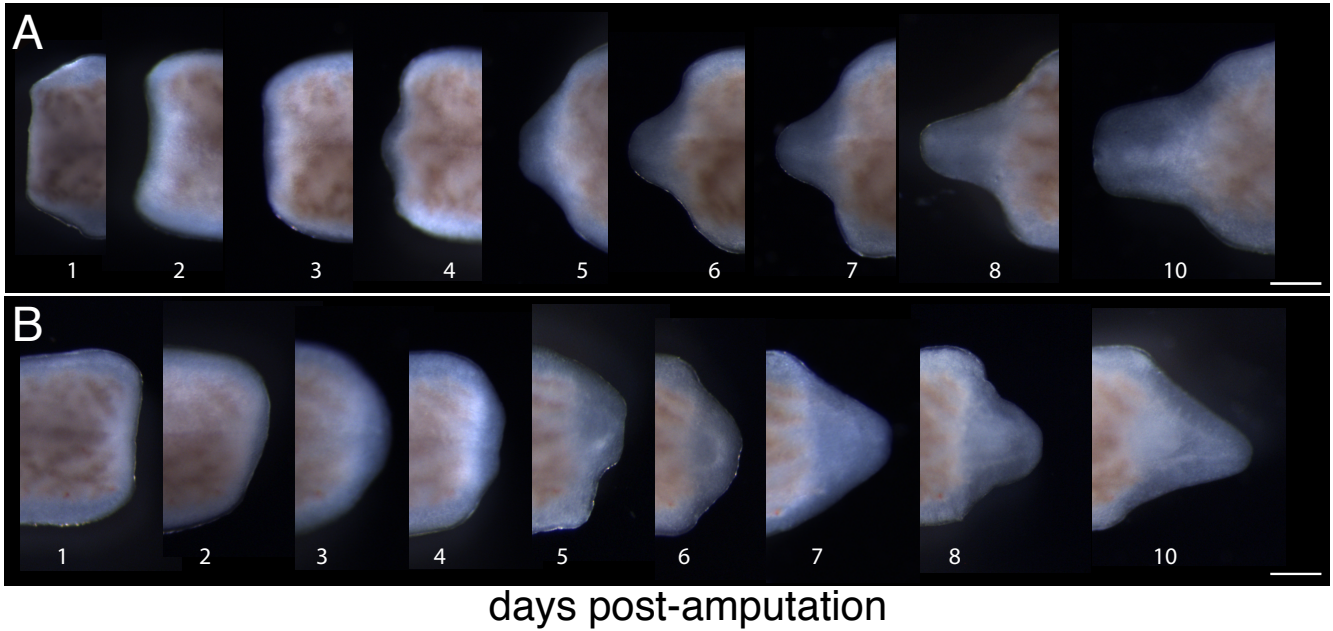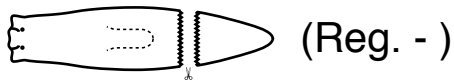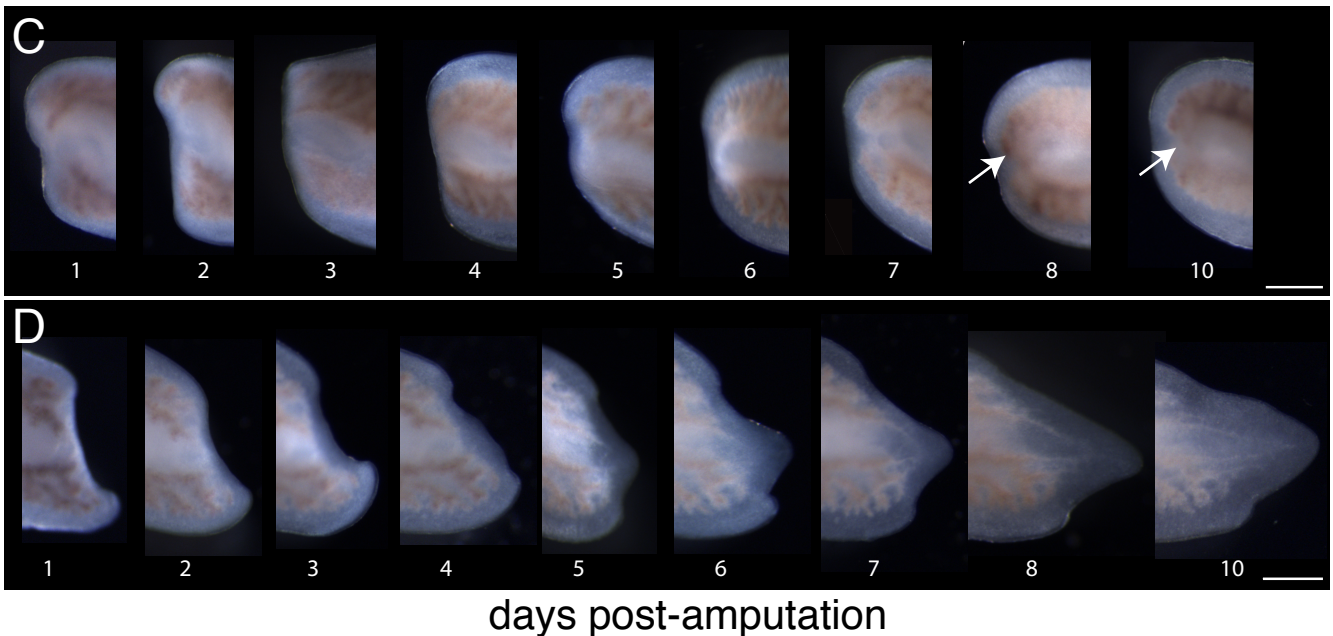

**Supplemental Figure 1** | *Prococtyla fluviatilis* has limited regenerative abilities. Animals fail to regenerate anterior structures when amputated in posterior body regions. (a) Tail regeneration over 10 days following amputation in Reg+ tissues. (b) Complete head regeneration 10 days after amputation in Reg+ tissues. (c) Tail regeneration occurs in posterior-facing wounds after amputation in Reg- tissues. (d) Head regeneration fails to occur when amputated in Reg- tissues posterior to the pharynx. White arrows indicate repatterning of gut branches. Cartoons represent site of respective amputation. Scale bars, 250  $\mu\text{m}$ . Anterior is to the left in all panels.

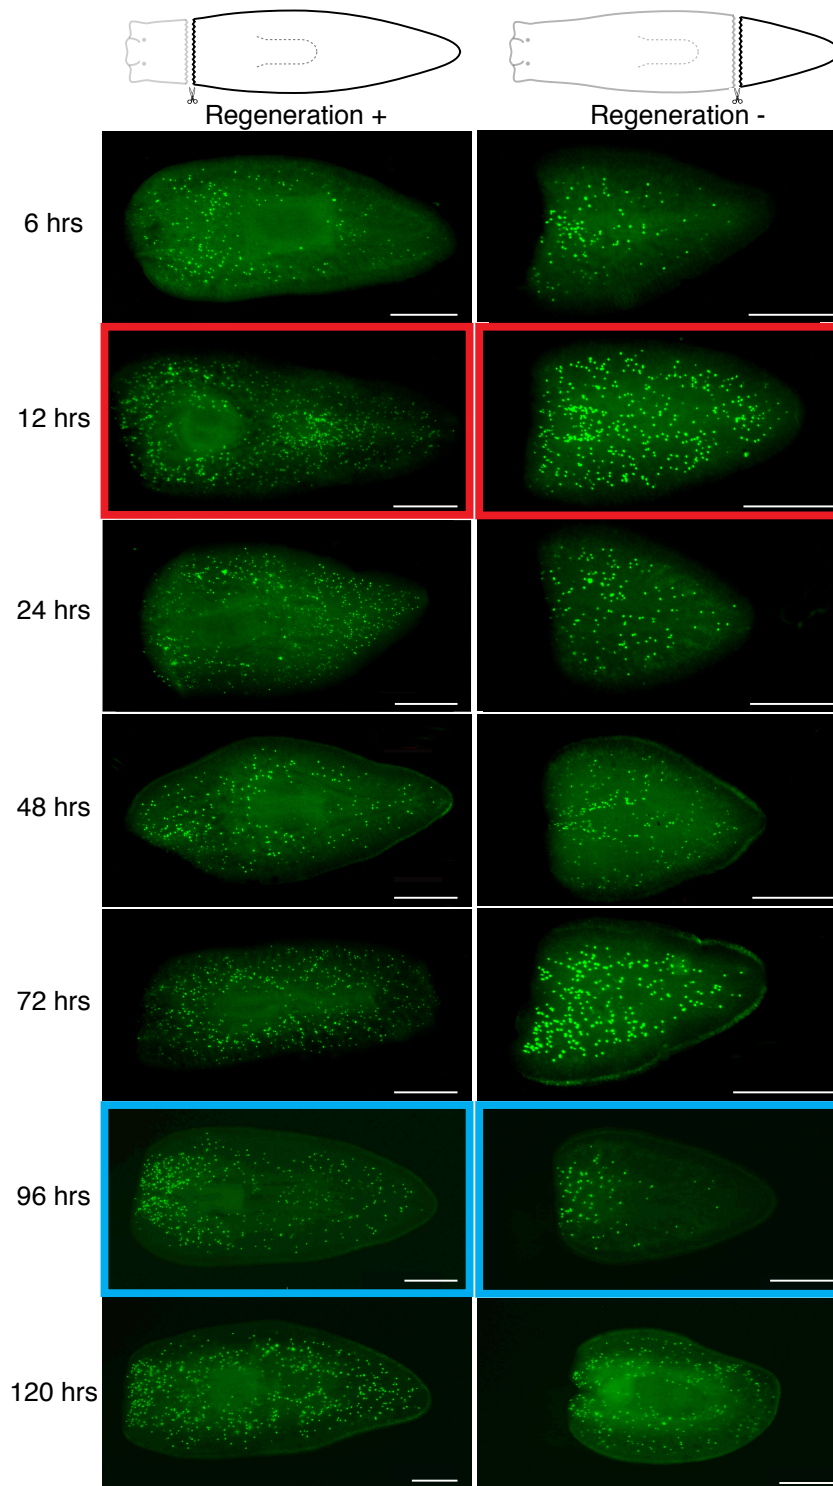

**Supplemental Figure 2** | Neoblast proliferation following amputation in Reg+ and Reg- tissues. Phosphohistone H3 (Ser 10) immunostaining reveals patterns of cell division after anterior amputation. Red boxes indicate time point with a systemic increase in cell division. Blue boxes indicate time point with a localized increase in cell division near the wound site. Anterior is to the left in all panels. Scale bars, 500  $\mu$ m. Note that regeneration occurs more slowly in *P. fluviatilis* when compared to other planarian species, such as *Schmidtea mediterranea* and *Dugesia japonica*; therefore mitotic peaks appear somewhat delayed.

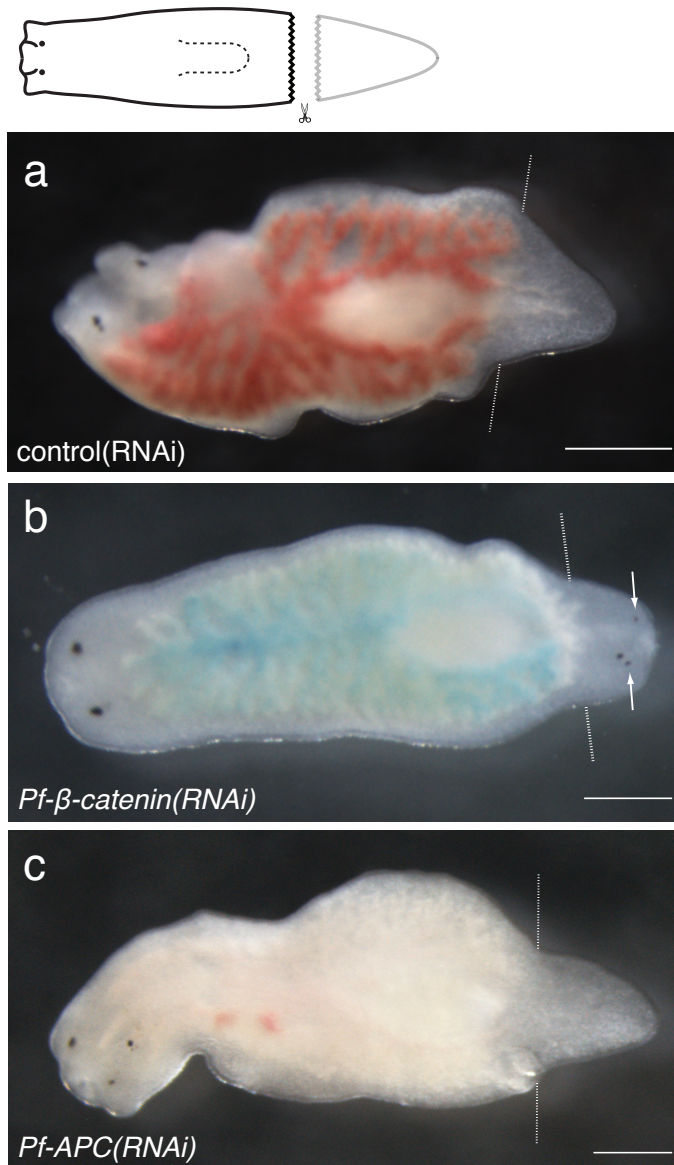

**Supplemental Figure 3** | Regeneration of *P. fluviatilis* (RNAi) animals after amputation. (a) Normal tail regeneration occurs at posterior-facing wounds 15 days after amputation in control(RNAi) animals. (b) *Pf-β-catenin1*(RNAi) animals regenerate a second head at posterior-facing wounds within 15 days after amputation. White arrows indicate regenerated eyespots. (c) Normal tail regeneration occurs at posterior-facing wounds within 15 days after amputation in *Pf-APC*(RNAi) animals. Dashed lines represent amputation planes. Cartoon represents site of amputation. Anterior is to the left in all panels. Scale bars, 500  $\mu$ m.



### a. Control

GGATCCTAATACGACTCACTATAGGGAGATTTAGGTGACACTATAGAAGTGACCTTAGGTCCTCGAG  
TTTCTACTGTATCGACCTGCAGACTGGCTGTGTATAAGGGAGCCTGACATTTATATTTCCCGAAGACAT  
CAGGTTAATGGCGTTTTTGTATGTCATTTTCGCGGTGGCTGAGATCAGCCACTTCTTCCCGATAACG  
GAGACCGGCACACTGGCCATATCGGTGGTATCATGCGCCAGCTTTTCATCCCGATATGCACCACC  
GGGTAAAGTTCACGGGAGACTTTATCTGACAGCAGACGTGCACTGGCCAGGGGGATCACCATCCGT  
CGCCCGGGCGTGTCAATAATATCACTCTGTACATCCACAAACAGACGATAACGGCTCTCTTTTTATA  
GGTGTAAACCTTAAACTGCATTTACCAGTCCCTGTTCTCGTCAGCAAAGAGCCGTTTCAATTAATA  
AACCGGGCGACCTCAGCCATCCCTTCCCTGATTTTCCGCTTTCCAGCGTTCCGGCACGCAGACGACGG  
GCTTCATTCTGCATGGTTGTGCTTACCAGACCGGAGATATTGACATCATATATGCCTTGAGCAACTGA  
TAGCTGTGCTGTCAACTGTCACTGTAATACGCTGCTTCATAGCACACCTCTTTTTGACATACTTCGG  
GTATACATATCAGTATATATTCTTATACCGCAAAAATCAGCGCGCAAATACGCATACTGTTATCTGGCT  
TTTTAGTAAGCCGGATCCACGCGATTACGCCCCGCCCTGCCACTCATCGCAGTACTGTTGTAATTCAT  
TAAGCATTCTGCCGACATGGAAGCCATCACAGACGGCATGATGAACCTGAATCGCCAGCGGCATCA  
GCACCTTGTGCGCTTGCCTATAATATTTGCCATGGTGAAAACGGGGCGAAGAAGTTGTCCATATT  
GGCCAGTTTTAAATCAAACCTGGTGAAAACCTACCAGGGATTGGCTGAGACGAAAAACATATTCTCA  
ATAAACCTTTTAGGGAAATAGGCCAGGTTTTACCCTAACACGCCACATCTTGCGAATATATGTGTAG  
AAACTGCCGGAAATCGTCGTGGTATTCACTCCAGAGCGATGAAAACGTTTTAGTTTTGCTCATGGAAA  
ACGGTGTAAACAAGGGTGAACACTATCCCATATCACCAGCTCACCGTCTTTTATTGCCATACGGAATT  
CCGGATGAGCATTTCATCAGGCGGGCAAGAATGTGAATAAAGGCCGGATAAAACTTGTGCTTATTTTT  
CTTTACGGTCTTTAAAAAGGCCGTAATATCCAGCTGAACGGTCTGGTTATAGGTACATTGAGCAACTG  
ACTGAAATGCCTCAAAATGTTCTTTACGATGCCATTGGGATATATCAACGGTGGTATATCCAGTGATT  
TTTTTCTCCATTTTAGCTTCTTAGCTCCTGAAAATCTCGATAACTCAAAAATACGCCCGGTAGTGAT  
CTTATTTTATTATGGTGAAGTTGGAACCTTTACGTGCCGATCAACGTCTCATTTCGCCAAAAGTT  
GGCCAGGGCTTCCCGGTATCAACAGGGACACCAGGATTTATTTATTCTGCGAAGTGATCTTCCGTC  
ACAGGTATTTATTCCGGCGCAAAGCGGCCGCGACCTAAGGTCTCCCTTAGTGAGGGTTAATTCTCC  
TATAGTGAGTCGTATTAGGATCC

### b. *Pf-wnt1*

TAAGTGAACAATCCCGTCTTCGTAAATCATCTGCGGATCACAAAGATGGTGGCATCTTTATAAATTGC  
GAATTACCCCTGATTTCCCAACTAATTCTTTACAATACGTTTTACCAGACATCAATGGCACCAGTTTT  
ATAGTTTTGATCCGATTCGTGTCAGTTATATTGAGACAAAGTAACCTTCAATTGGAAAAACGATACC  
AATATCCCGCAAATAAAGATCTGATTCAAATAACTCTTGAAGCTGCTAGAAAAGGAATATTCACATG  
TCATCAGCAATTTGCAACCAGTAGATGGAAGTGTCCAACCTCAAATCTCAACAATCCGTCAGCGTTAT  
TATTCGGTGATATTACGTTGAAAGGTCTTCTGAAACTGCGTTTCAATTTATGCCATGTTAAGTGCTAGTT  
TAGTTCAAACAGTGGCCGAAGCTTGTCAAATCGATTACCTCATTGTCCTTGTAAATAACAAAGGAAGG  
ACGACGCAAAACAAATGG

### c. *Pf-wnt11-1*

GCAGGTCTTGAGATAATGAAACGAAGTTGGAAGTCTAAATGCAAGTGTACCGAGTAAGTGGAAAGTT  
GTGCCAATGAAATCTGCTTCCGACAGCTTCGAAGACTTGATGATGTGCTTCTACTCAAGAACTCAA  
GATAGCTACTTGACTGCAAAATACGTAACCTTCTGGAAGAAATGGGATTTTATATACTGATCAAAATGTT  
GCTCTGAAAGAAACAGAGTTAGCTTTTATGGAGCATTCTCCTGATTATTGTGAACCAGAACCAAAAAT  
GGGATCAATTGGAACCTCTGAATAGACAATGTGAAACGACGAATCTAACTCAGGCGGACACTTATCAT  
TGTAACAACATGTGCTGTGGAAGAGGATTCCGAACATCGATAGAAGAAGAAACTGTCAAATGCAAAT  
GCAGTTTAGATCAGTATTTCTCCGTTAAGTGTAATTTGTGCACTAAAATAAATGAATATAAATTTTGT  
TGTAATAATTCATGTTGCATTTTCGCTCAACAACTGACATTTACTTTGTGATAGACTCGTACGAA

### d. *Pf-wnt11-2*

CATGAGTATCATGGTCCCAGACTATGGATCTACCTCATCACTATCTTCCGTGGTCAGCCTCCACCA  
ATCCATCAACTGGTTAGGCATCTCTCAGTACAACCGACCCGAAATTCACGAATTGAAGGCATTCTCTG  
AGGTGCAATGTCATTTTCATCAGTACCAACCATGGTCTAAGACAACGCCAGGCGAGATTTTGCCTTAG  
CAAACAACATAAATTCGCAATGCACGGTATTCTGAGGGGGGCCAAGGCAGCAGTGATTACTGCATG  
AAAACCTTCCAGGATCGACGGTGGAAATTGCTCCTCAACCGAGAGACTGCCACACGTAGGCAAAGAT  
CTCCAGCTTGGTACCCAGGAACAAGCAGTGGTACATGCTTTTGCCAGTTCTTCAGTGTTGTACGAAA  
TTGCGAGAAGATGTGCCAGAAATAAATTTCTTATTGCTCTTGTGGGAATTCCGACCAAAGTCAGAGC  
GAGGAAAATTCTCAGCGTCTGCTTATGTTTGCAGGGTGTCTTGACAATGTAGATGTGGGGATTAAGT

**Supplemental Figure 5** | Nucleotide sequences used for RNAi. DNA sequences used as templates for dsRNA synthesis for (a) Control, (b) *Pf-wnt1*, (c) *Pf-wnt11-1*, (d) *Pf-wnt11-2*, (e) *Pf-β-catenin1* and (f) *Pf-APC* RNAi treatments.

|                                    |      |      |      |      |       |       |       |      |
|------------------------------------|------|------|------|------|-------|-------|-------|------|
| Expression $\Delta$<br>Reg+ (A-A') | ↓    | ↑    | ↑    | ↓    | ↑     | -     | ↓     | -    |
| Expression $\Delta$<br>Reg- (B-B') | ↓    | ↑    | ↓    | ↑    | -     | ↑     | -     | ↓    |
| Number of<br>contigs               | 35   | 39   | 537  | 842  | 5928  | 3004  | 4386  | 970  |
| Ratio of<br>contigs                | 0.3% | 0.2% | 3.4% | 5.3% | 37.7% | 19.0% | 27.9% | 6.2% |

**Supplementary Table 1** | Distribution of contigs (n=15,741) with significant changes in expression level (compared to uncut controls) after amputation in Reg+ (red) and Reg- (blue) tissues based on RNAseq.

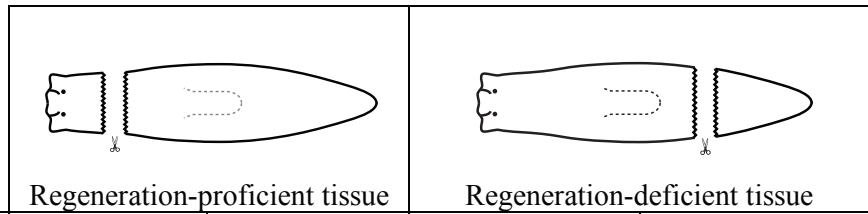

| RNAi Treatment                           | Regeneration-proficient tissue |                 | Regeneration-deficient tissue |                   |
|------------------------------------------|--------------------------------|-----------------|-------------------------------|-------------------|
|                                          | Anterior reg.                  | Posterior reg.  | Anterior reg.                 | Posterior reg.    |
| <i>Pf-wnt1</i>                           | -- (10/10)                     | -- (10/10)      | -- (10/10)                    | -- (9/9)          |
| <i>Pf-wnt11-1</i>                        | -- (9/9)                       | delay (10/10)   | -- (10/10)                    | delay (9/9)       |
| <i>Pf-wnt11-2</i>                        | -- (10/10)                     | delay (10/10)   | -- (10/10)                    | delay (10/10)     |
| <i>Pf-wnt1 + Pf-wnt11-1 + Pf-wnt11-2</i> | -- (10/10)                     | delay (8/9)     | -- (10/10)                    | delay (9/9)       |
| <i>beta-catenin1</i>                     | -- (9/9)                       | head reg. (9/9) | head reg. (64/71)             | head reg. (56/64) |
| <i>APC</i>                               | tail reg. (5/10)               | -- (9/9)        | tail reg. (14/53)             | -- (53/53)        |
| control                                  | -- (9/9)                       | -- (10/10)      | -- (67/67)                    | -- (67/67)        |

**Supplementary Table 2** | Effects of dsRNA injection on anterior and posterior regeneration following amputations in Reg<sup>+</sup> and Reg<sup>-</sup> tissues. Dashes represent no alteration from the normal condition following amputation. Results labeled in yellow indicate rescue of regeneration in Reg<sup>-</sup> tissue.

Primers for gene amplification

| Gene            | Fwd primer                       | Rev primer                       |
|-----------------|----------------------------------|----------------------------------|
| Pf-APC          | 5'-CAGCTCGTGCTTCTTTGAAC-3'       | 5'-ACACCTTCGGTTTCTCCTTG-3'       |
| Pf-beta catenin | 5'-GGGTACGATGAAATGGATTCTG-3'     | 5'-GTTGCAGCATCTGACAAGTTTC-3'     |
| Pf-ndk          | 5'- AGTCTACGACAAAGACATGTGCAGC-3' | 5'-CGCATTGGCAAAGTGAGACCCTC-3'    |
| Pf-sFRP1        | 5'- CGGAGTGGAACAACCTCATCTACGG-3' | 5'-GCTTCCACAAATCTGTTGCTCTAGCG-3' |
| Pf-wnt11-1      | 5'- AAGATTAACGGCCACAACACTACG-3'  | 5'-CTATCGATGTTTCGGAATCCTCT-3'    |
| Pf-wnt11-2      | 5'-ATGAGTATCATGGTCCCAGAC-3'      | 5'-CGAACGGATTCCCTATGTAAAG-3'     |
| Pf-wnt1         | 5'-TAACTGGAACAATCCCGTCTTC-3'     | 5'-GCGTCGTCCTTCCTTTGTTAT-3'      |

Primers for qPCR

| Gene            | Fwd primer                 | Rev primer                   |
|-----------------|----------------------------|------------------------------|
| Pf-actin        | 5'-AGAGGAAGACGTTGCTGCTT-3' | 5'-TGACCCATACCAACCATGAC-3'   |
| Pf-APC          | 5'-TGTTCTCACGGTCAAGTTCC-3' | 5'-GATCACATGGTGAGACTGCTTC-3' |
| Pf-beta catenin | 5'-ACAGCTGAAGACATCGAGGA-3' | 5'-GTGGCACTTGTTCCTGGTTT-3'   |
| Pf-ndk          | 5'-TACGGATCAGTTGCTGGATG-3' | 5'-AGCCATCCATATCCTTGGTG-3'   |
| Pf-sFRP1        | 5'-AGCGTGCTTACCGAGTATGA-3' | 5'-TGTTGACAGTTCGAGGGATG-3'   |
| Pf-sFRP2        | 5'-AGGATTGGCAAAGACTCACC-3' | 5'-GCGTACAAGGAGCACAGAAA-3'   |
| Pf-wnt1         | 5'-AGTTCAAACAGTGGCCGAAG-3' | 5'-CCATTTGTTTTGCGTCGTC-3'    |
| Pf-wnt2         | 5'-CCGTCAAAGAGGAAACTCGT-3' | 5'-GGATGTGTCGTTGCATTCTC-3'   |
| Pf-wnt11-1      | 5'-CGCAGCAGGTCTTGAGATAA-3' | 5'-AGCTGTCGGAAGCAGATTTC-3'   |
| Pf-wnt11-2      | 5'-GCAATGCACGGTATTCTGAG-3' | 5'-TCTCGGTTGAGGAGCAATTC-3'   |
| Pf-wnt11-5      | 5'-AAATCTACCCCGGAATCAGC-3' | 5'-CTGCAAGCCTTTGTGACTTG-3'   |

**Supplemental Table 3** | Oligonucleotides used to amplify genes from *P. fluviatilis* cDNA and to conduct qRT-PCR.
